# Supplementary material for: Comparison of Face Washing and Face Wiping Methods for Trachoma Control: A Pilot Study
Source: PubMed Central journal article supplement (PMC7124903; doi:10.4269/ajtmh.19-0726), 2020-02-10
Supplement: tpmd190726.SD1.pdf [file tpmd190726.SD1.pdf]

The following are supplemental materials and will be published online only

**Supplemental Table 1: *C. trachomatis* removal from face according to face cleaning protocol**

| <b>Face cleaning protocol followed</b> | <b>N</b>  | <b><i>C. trachomatis</i> on face at baseline</b> | <b>Residual <i>C. trachomatis</i> detected following face cleaning (% among those with <i>C. trachomatis</i> at baseline)</b> | <b><i>P</i>-value</b> |
|----------------------------------------|-----------|--------------------------------------------------|-------------------------------------------------------------------------------------------------------------------------------|-----------------------|
| Washed with soap                       | 17        | 1                                                | 0 (0.0%)                                                                                                                      | 0.321                 |
| Washed with water                      | 19        | 3                                                | 1 (33.3%)                                                                                                                     |                       |
| Wiped with hand                        | 47        | 9                                                | 6 (66.6%)                                                                                                                     |                       |
| <b>Total</b>                           | <b>83</b> | <b>13</b>                                        | <b>7 (53.8%)</b>                                                                                                              |                       |
